# Supplementary material
Source: PubMed Central journal article supplement (PMC2626733)
Supplement: 0806339106_Appendix_PDF.pdf [file 0806339106_Appendix_PDF.pdf]

---

**Appendix: Uncorrected allele frequencies at the nine microsatellite loci used.**

---

| <b>locus</b> | <b>allele size</b> | <b>yellow</b> | <b>“rosada”</b> | <b>private</b> |
|--------------|--------------------|---------------|-----------------|----------------|
| CS1          | 100                | 0.119         | 0.000           | Yellow         |
|              | 104                | 0.262         | 0.233           |                |
|              | 106                | 0.191         | 0.167           |                |
|              | 108                | 0.155         | 0.400           |                |
|              | 110                | 0.250         | 0.067           |                |
|              | 112                | 0.024         | 0.133           |                |
| CS3          | 89                 | 0.000         | 0.233           | Rosada         |
|              | 95                 | 0.691         | 0.767           |                |
|              | 101                | 0.095         | 0.000           | Yellow         |
|              | 104                | 0.095         | 0.000           | Yellow         |
|              | 107                | 0.119         | 0.000           | Yellow         |
| CS4          | 96                 | 0.119         | 0.000           | Yellow         |
|              | 102                | 0.083         | 0.000           | Yellow         |
|              | 104                | 0.548         | 0.933           |                |
|              | 110                | 0.155         | 0.033           |                |
|              | 112                | 0.000         | 0.033           | Rosada         |
|              | 114                | 0.071         | 0.000           | Yellow         |
|              | 120                | 0.024         | 0.000           | Yellow         |
| CS5          | 102                | 0.071         | 0.000           | Yellow         |
|              | 104                | 0.571         | 0.000           | Yellow         |
|              | 106                | 0.024         | 0.000           | Yellow         |
|              | 108                | 0.095         | 0.133           |                |
|              | 112                | 0.107         | 0.000           | Yellow         |
|              | 114                | 0.012         | 0.000           | Yellow         |
|              | 116                | 0.012         | 0.833           |                |
|              | 118                | 0.000         | 0.033           | Rosada         |
|              | 120                | 0.107         | 0.000           | Yellow         |
| CS6          | 102                | 0.298         | 0.000           | Yellow         |
|              | 106                | 0.012         | 0.167           |                |
|              | 108                | 0.024         | 0.033           |                |
|              | 110                | 0.488         | 0.233           |                |
|              | 112                | 0.179         | 0.567           |                |
| CS7          | 163                | 0.036         | 0.000           | Yellow         |
|              | 167                | 0.012         | 0.000           | Yellow         |
|              | 169                | 0.071         | 0.000           | Yellow         |
|              | 171                | 0.012         | 0.000           | Yellow         |
|              | 173                | 0.060         | 0.000           | Yellow         |
|              | 175                | 0.024         | 0.000           | Yellow         |
|              | 177                | 0.191         | 0.000           | Yellow         |

|      |     |       |       |        |
|------|-----|-------|-------|--------|
|      | 179 | 0.036 | 0.000 | Yellow |
|      | 181 | 0.179 | 0.000 | Yellow |
|      | 183 | 0.012 | 0.000 | Yellow |
|      | 185 | 0.119 | 0.000 | Yellow |
|      | 187 | 0.036 | 0.000 | Yellow |
|      | 189 | 0.048 | 0.000 | Yellow |
|      | 191 | 0.012 | 0.000 | Yellow |
|      | 193 | 0.107 | 0.000 | Yellow |
|      | 197 | 0.036 | 0.000 | Yellow |
|      | 201 | 0.012 | 0.000 | Yellow |
|      | 245 | 0.000 | 0.033 | Rosada |
|      | 259 | 0.000 | 0.133 | Rosada |
|      | 261 | 0.000 | 0.033 | Rosada |
|      | 263 | 0.000 | 0.200 | Rosada |
|      | 265 | 0.000 | 0.167 | Rosada |
|      | 275 | 0.000 | 0.200 | Rosada |
|      | 277 | 0.000 | 0.033 | Rosada |
|      | 279 | 0.000 | 0.033 | Rosada |
|      | 333 | 0.000 | 0.167 | Rosada |
| CS8  | 119 | 0.167 | 0.000 | Yellow |
|      | 123 | 0.071 | 0.000 | Yellow |
|      | 127 | 0.250 | 0.867 |        |
|      | 131 | 0.345 | 0.133 |        |
|      | 135 | 0.167 | 0.000 | Yellow |
| CS9  | 115 | 0.321 | 0.000 | Yellow |
|      | 117 | 0.226 | 0.100 |        |
|      | 119 | 0.143 | 0.000 | Yellow |
|      | 121 | 0.036 | 0.000 | Yellow |
|      | 123 | 0.143 | 0.000 | Yellow |
|      | 125 | 0.060 | 0.833 |        |
|      | 127 | 0.036 | 0.033 |        |
|      | 129 | 0.012 | 0.000 | Yellow |
|      | 131 | 0.000 | 0.033 | Rosada |
|      | 133 | 0.024 | 0.000 | Yellow |
| CS10 | 125 | 0.036 | 0.000 | Yellow |
|      | 127 | 0.048 | 0.000 | Yellow |
|      | 129 | 0.250 | 0.000 | Yellow |
|      | 131 | 0.167 | 0.067 |        |
|      | 133 | 0.226 | 0.000 | Yellow |
|      | 135 | 0.119 | 0.933 |        |
|      | 137 | 0.119 | 0.000 | Yellow |
|      | 139 | 0.036 | 0.000 | Yellow |
